# Supplementary material for: Atomic adsorption on monolayer Cu2Se: a first-principles study
Source: Royal Society of Chemistry journal article supplement (doi:10.1039/d1cp00169h), 2021-01-01
Supplement: d1cp00169h1.pdf [file d1cp00169h1.pdf]

## Supplementary Information

# Atomic adsorption on monolayer Cu<sub>2</sub>Se: a first-principles study

*Yizhou You,<sup>1,2</sup> Huimin Hu,<sup>1,2</sup> and Jin-Ho Choi<sup>1,2,\*</sup>*

<sup>1</sup>College of Energy, Soochow Institute for Energy and Materials Innovations,  
Soochow University, Suzhou 215006, China

<sup>2</sup>Key Laboratory of Advanced Carbon Materials and Wearable Energy Technologies  
of Jiangsu Province, Soochow University, Suzhou 215006, China

### Available content:

- Computational Details
- Figure S1. The orbital-decomposed DOS of  $\zeta$ -Cu<sub>2</sub>Se decorated with adatoms within PBE-D3+U scheme. (a) – (e): H, B, C, N and O.
- Figure S2. The orbital-decomposed DOS of  $\zeta$ -Cu<sub>2</sub>Se decorated with adatoms within PBE-D3+U scheme. (a) – (e): Li, Na, K, Ca and Al.
- Figure S3. The orbital-decomposed DOS of  $\zeta$ -Cu<sub>2</sub>Se decorated with adatoms within PBE-D3+U scheme. (a) – (e): Fe, Co, Ni, Cu and Zn.
- Figure S4. The orbital-decomposed DOS of  $\zeta$ -Cu<sub>2</sub>Se decorated with adatoms within PBE-D3+U scheme. (a) – (d): Pd, Ag, Pt, and Au.
- Figure S5. Band structures of Pt/Cu<sub>2</sub>Se using PBE-D3+U method (a) without and (b) with spin orbit coupling effect.
- Figure S6. The orbital-decomposed DOS of  $\lambda$ -Cu<sub>2</sub>Se decorated with adatoms. (a) – (d): O, Li, Fe, and Au.

## Computational Details

### Formation energy calculation:

The formation energy ( $\Delta H$ ) of  $\text{Cu}_2\text{Se}$  per formula unit (f.u.) is defined as:

$$\Delta H = [E_{\text{tot}}(\text{Cu}_2\text{Se}) - n_{\text{Cu}}E_{\text{tot}}(\text{Cu}) - n_{\text{Se}}E_{\text{tot}}(\text{Se})]/n_{\text{Cu}_2\text{Se}}$$

where  $E_{\text{tot}}(\text{Cu}_2\text{Se})$  is the total energy of  $\zeta$ - $\text{Cu}_2\text{Se}$  or  $\lambda$ - $\text{Cu}_2\text{Se}$ ,  $E_{\text{tot}}(\text{Cu})$  and  $E_{\text{tot}}(\text{Se})$ ;  $n_{\text{Cu}}$ ,  $n_{\text{Se}}$  and  $n_{\text{Cu}_2\text{Se}}$  represent the number of Cu, Se,  $\text{Cu}_2\text{Se}$  units, respectively;  $E_{\text{tot}}(\text{Cu})$  and  $E_{\text{tot}}(\text{Se})$  are the total energy of Cu and Se atom in its bulk form, which is face-centered cubic Cu and  $P3_121$  Se, respectively.

### Gibbs free energy calculation:

The Gibbs free energy ( $\Delta G$ ) is calculated by:

$$\Delta G = \Delta E + \Delta ZPE - T\Delta S$$

where  $\Delta E$ ,  $\Delta ZPE$  and  $\Delta S$  represent the hydrogen adsorption energy, zero-point energy and entropy, respectively. Particularly, the value of  $T\Delta S$  for a hydrogen atom is 0.20 eV at 298 K.<sup>1</sup>

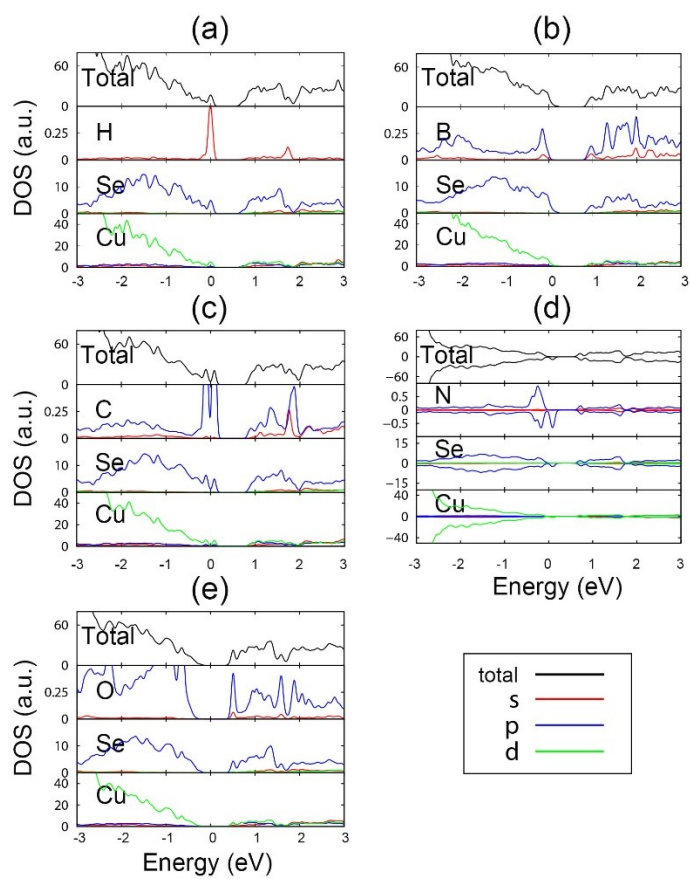

Figure S1. The fully orbital-decomposed DOS of  $\zeta$ -Cu<sub>2</sub>Se decorated with adatoms within the PBE-D3+U scheme: (a) H, (b) B, (c) C, (d) N, and (e) O.

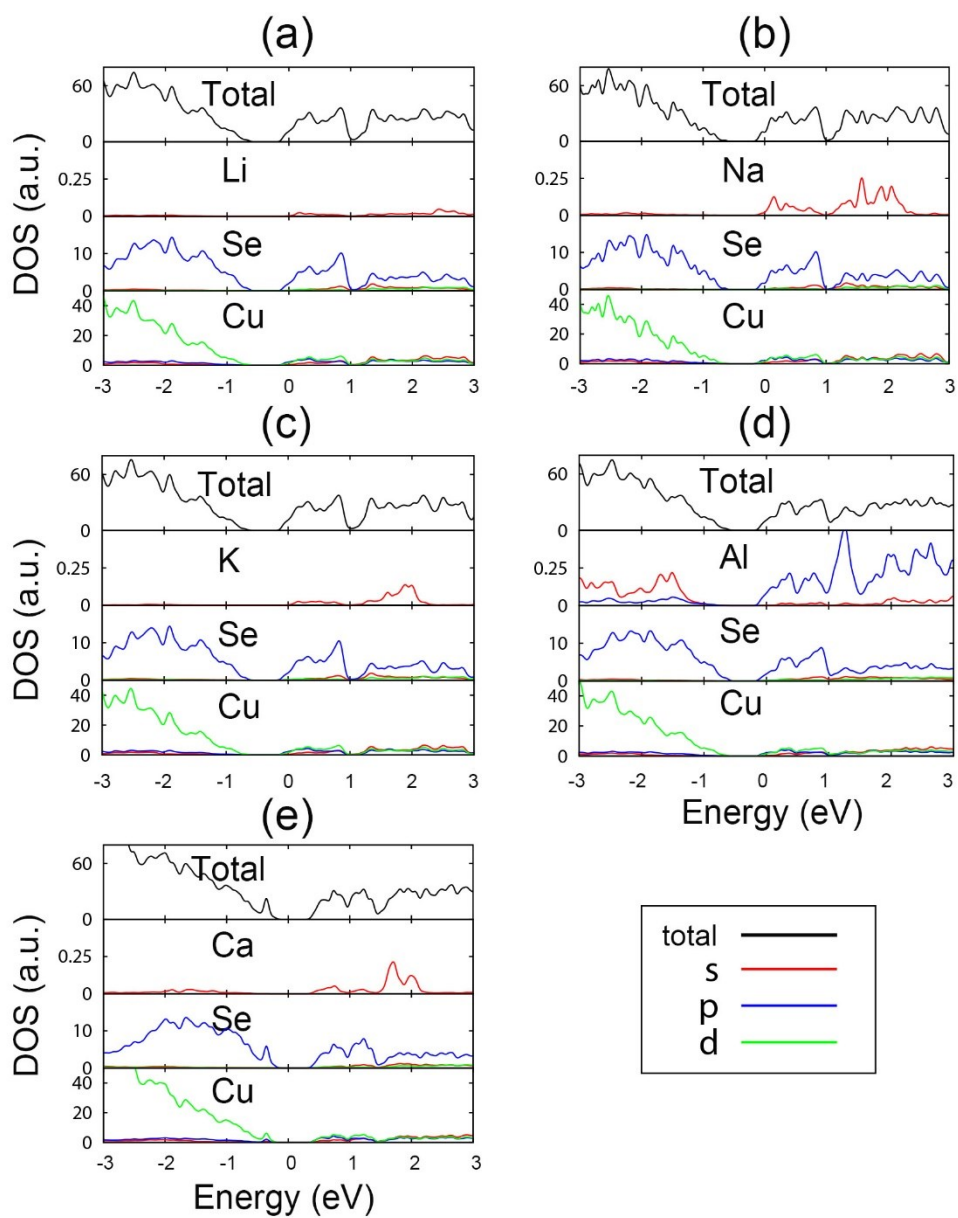

Figure S2. The fully orbital-decomposed DOS of  $\zeta$ -Cu<sub>2</sub>Se decorated with adatoms within the PBE-D3+U scheme: (a) Li, (b) Na, (c) K, (d) Al, and (e) Ca.

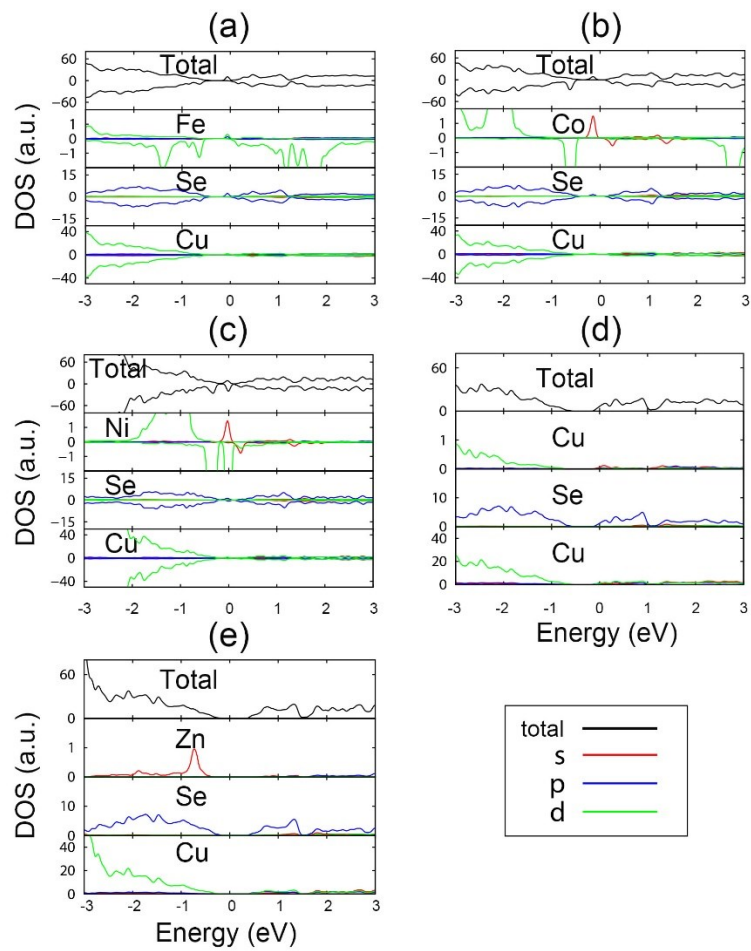

Figure S3. The fully orbital-decomposed DOS of  $\zeta$ -Cu<sub>2</sub>Se decorated with adatoms within the PBE-D3+U scheme: (a) Fe, (b) Co, (c) Ni, (d) Cu, and (e) Zn.

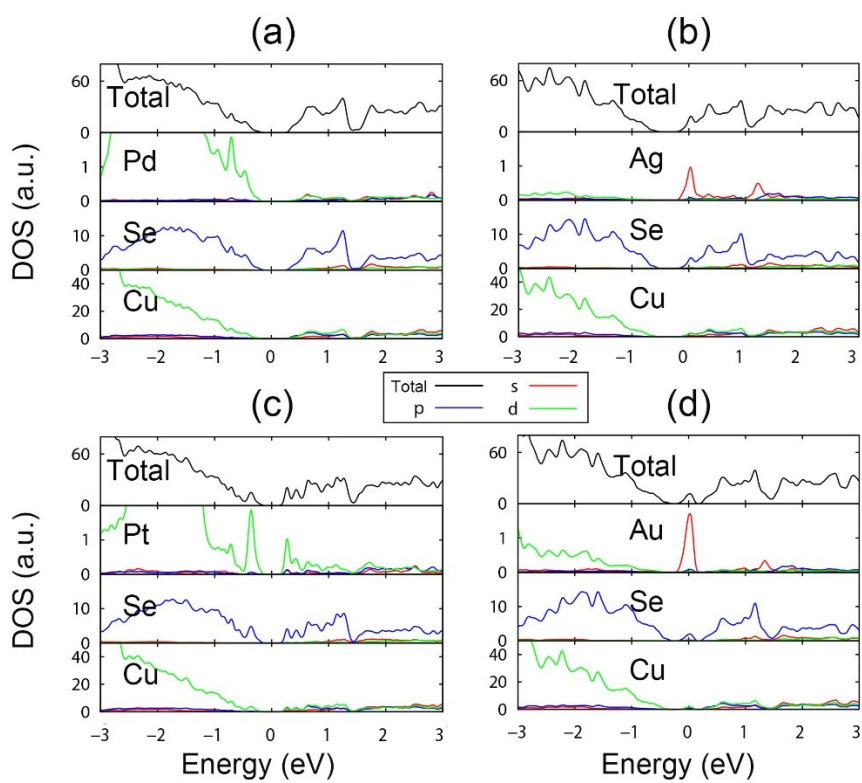

Figure S4. The fully orbital-decomposed DOS of  $\zeta$ -Cu<sub>2</sub>Se decorated with adatoms within the PBE-D3+U scheme: (a) Pd, (b) Ag, (c) Pt, and (d) Au.

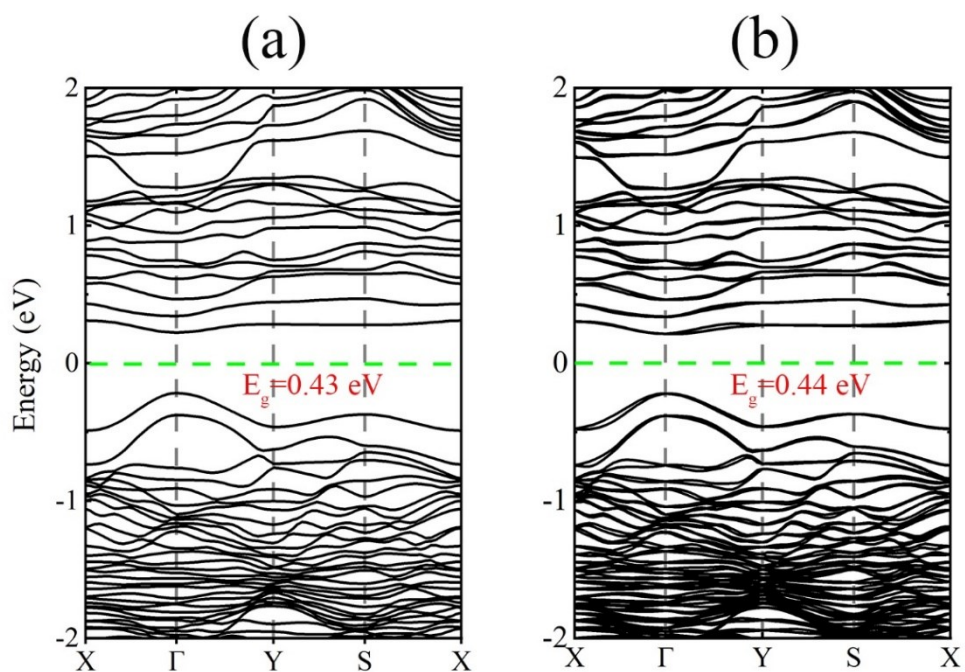

Figure S5. Band structures of Pt/Cu<sub>2</sub>Se using PBE-D3+U method (a) without and (b) with spin-orbit coupling effect.

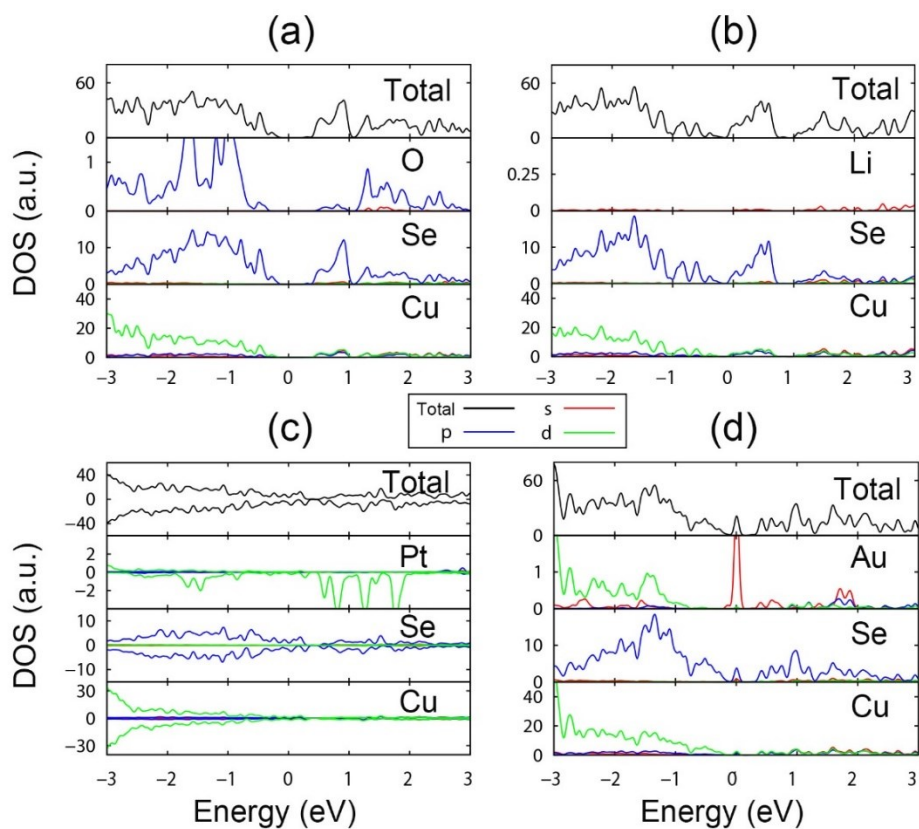

Figure S6. The fully orbital-decomposed DOS of  $\lambda$ -Cu<sub>2</sub>Se decorated with adatoms within the PBE-D3+U scheme: (a) O, (b) Li, (c) Fe, and (d) Au.

## Reference

- 1 Y. Ouyang, C. Ling, Q. Chen, Z. Wang, L. Shi and J. Wang, Activating Inert Basal Planes of MoS<sub>2</sub> for Hydrogen Evolution Reaction through the Formation of Different Intrinsic Defects, *Chem. Mater.*, 2016, **28**, 4390–4396.
